# Supplementary material for: pH-Responsive size-shrinkable mesoporous silica-based nanocarriers for improving tumor penetration and therapeutic efficacy
Source: Royal Society of Chemistry journal article supplement (doi:10.1039/d1nr07513f), 2021-12-17
Supplement: d1nr07513f1.pdf [file d1nr07513f1.pdf]

# pH-responsive size-shrinkable mesoporous silica-based nanocarrier for improved tumor penetration and therapeutic efficacy

Yongju He<sup>a,\*</sup>, Xingyu Fan<sup>a</sup>, Xiaozan Wu<sup>b</sup>, Taishun Hu<sup>a</sup>, Fangfang Zhou<sup>c</sup>, Songwen Tan<sup>d</sup>, Botao Chen<sup>e,\*</sup>, Anqiang Pan<sup>a</sup>, Shuquan Liang<sup>a</sup> and Hui Xu<sup>f</sup>

<sup>a</sup> School of Material Science and Engineering, Central South University, Changsha, Hunan 410083, China

<sup>b</sup> Science Park, Central South University, Changsha, Hunan 410083, China

<sup>c</sup> Department of Neurology, the Second Xiangya Hospital, Central South University, Changsha, Hunan 410011, China

<sup>d</sup> Xiangya School of Pharmaceutical Sciences, Central South University, Changsha, Hunan 410013, China

<sup>e</sup> Department of Hepatobiliary Surgery, Hunan Provincial People's Hospital The First-Affiliated Hospital of Hunan Normal University, Changsha, Hunan, China

<sup>f</sup> Institute of Super-Microstructure and Ultrafast Process in Advanced Materials, School of Physics and Electronics, Central South University, Changsha, Hunan 410083, China

Corresponding author: [heyongju@csu.edu.cn](mailto:heyongju@csu.edu.cn) & [hnsrmyy\\_cbt@126.com](mailto:hnsrmyy_cbt@126.com)

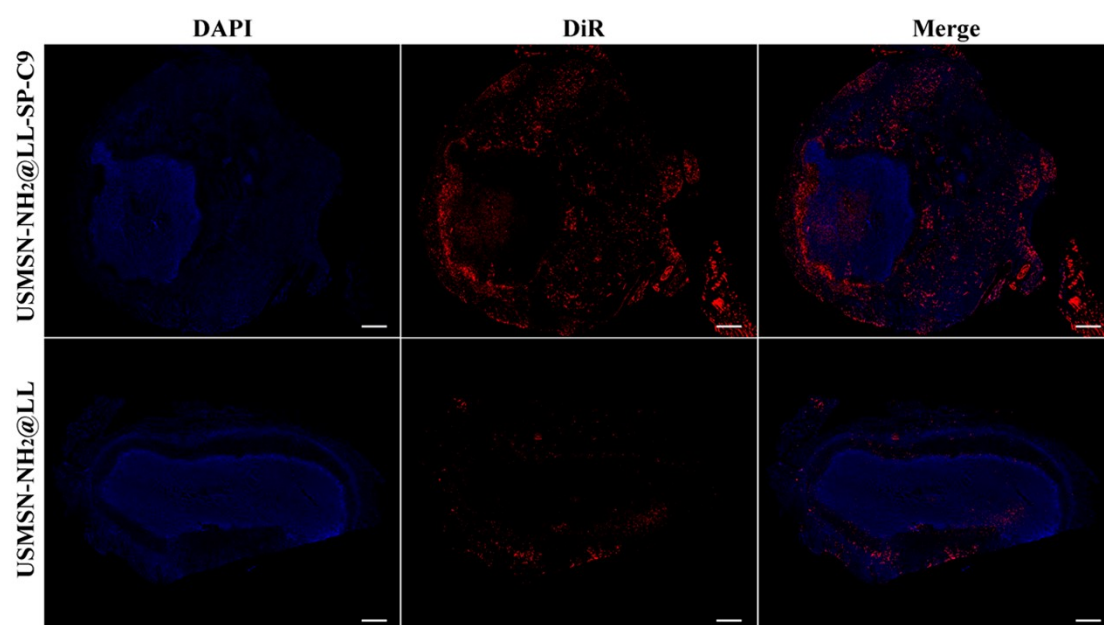

**Figure S1.** Whole slice scanning to examine the in vivo tumor penetration of USMSN-NH<sub>2</sub>@LL-SP-C9 and USMSN-NH<sub>2</sub>@LL. Bar scale 500  $\mu$ m.

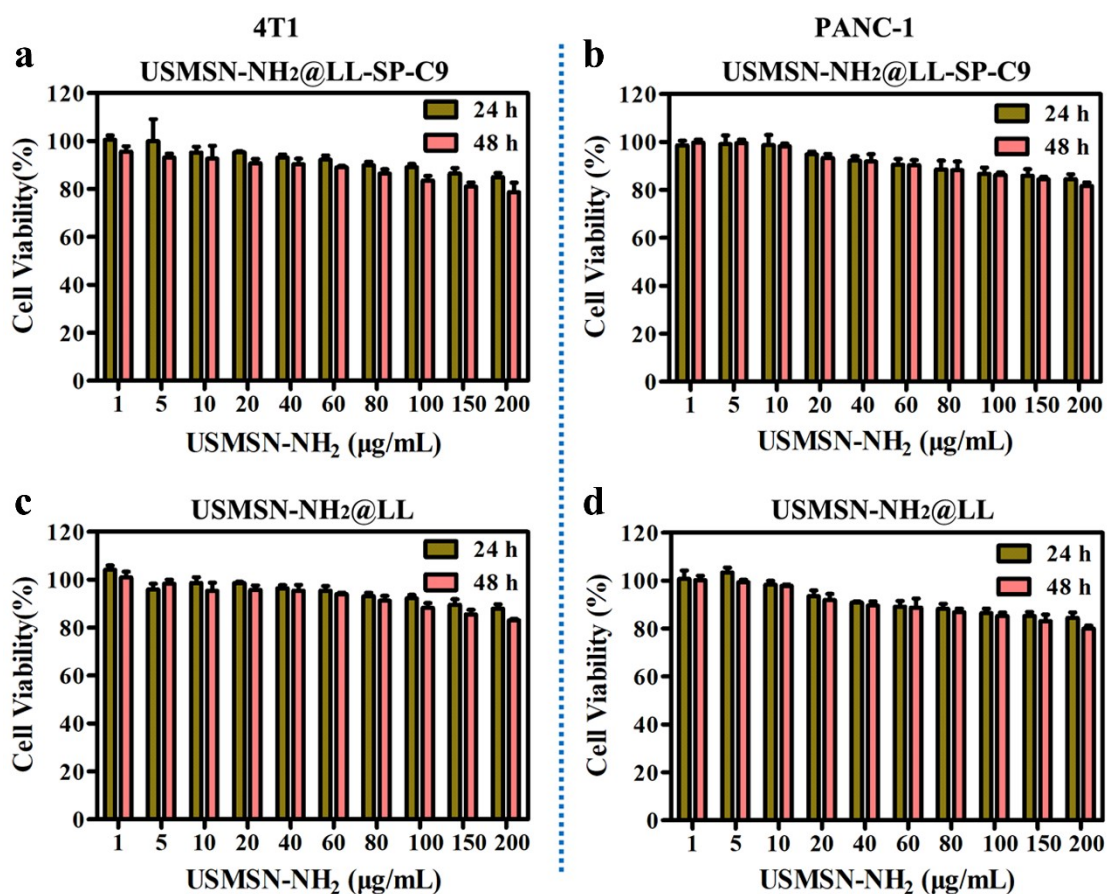

**Figure S2.** The cytotoxicity of blank USMSN-NH<sub>2</sub>@LL-SP-C9 and blank USMSN-NH<sub>2</sub>@LL against (a, c) 4T1 and (b, d) PANC-1 cells.

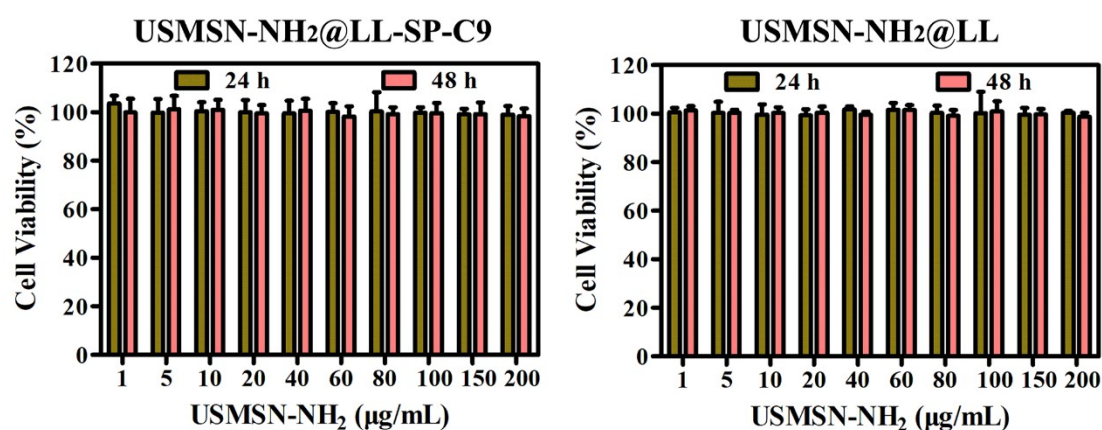

**Figure S3.** The cytotoxicity of blank USMSN-NH<sub>2</sub>@LL-SP-C9 and blank USMSN-NH<sub>2</sub>@LL against normal MOVAS cells.

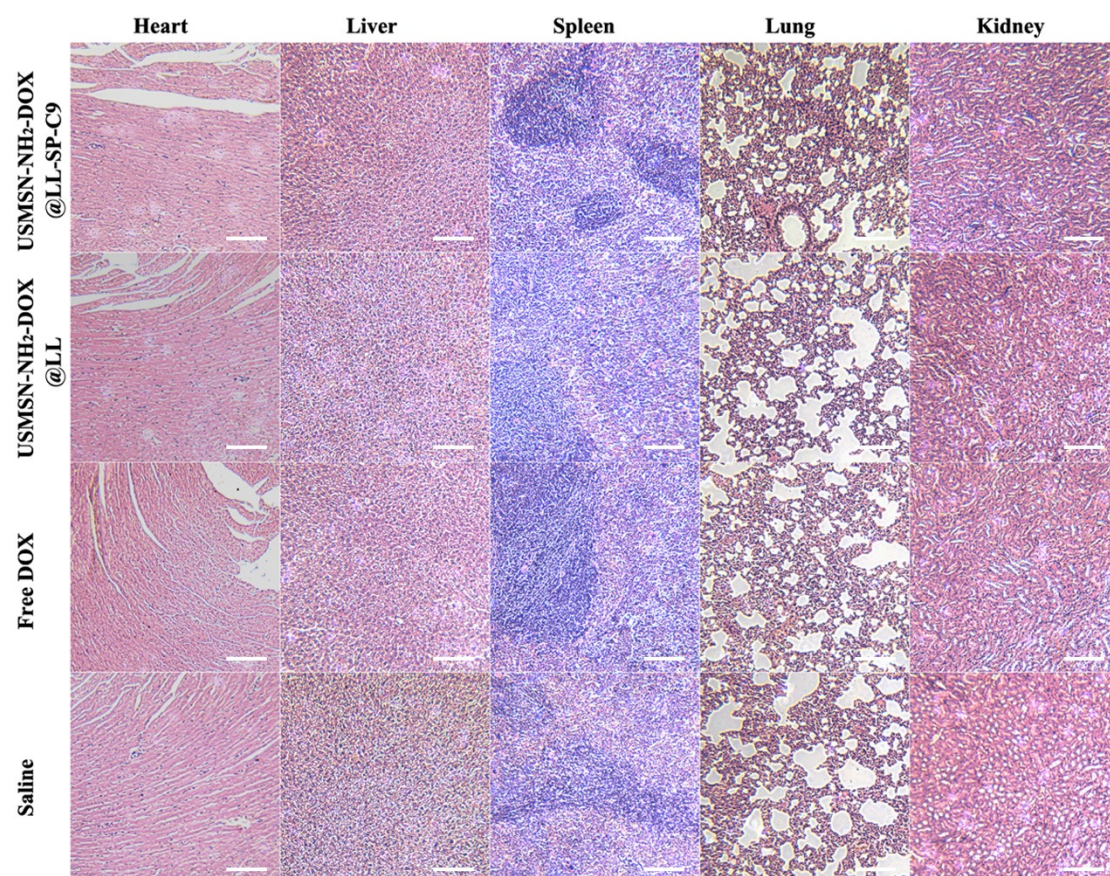

**Figure S4.** H&E images of the major organs taken from mice-bearing 4T1 tumor on the day 10 post treatment. Bar scale 100  $\mu$ m.

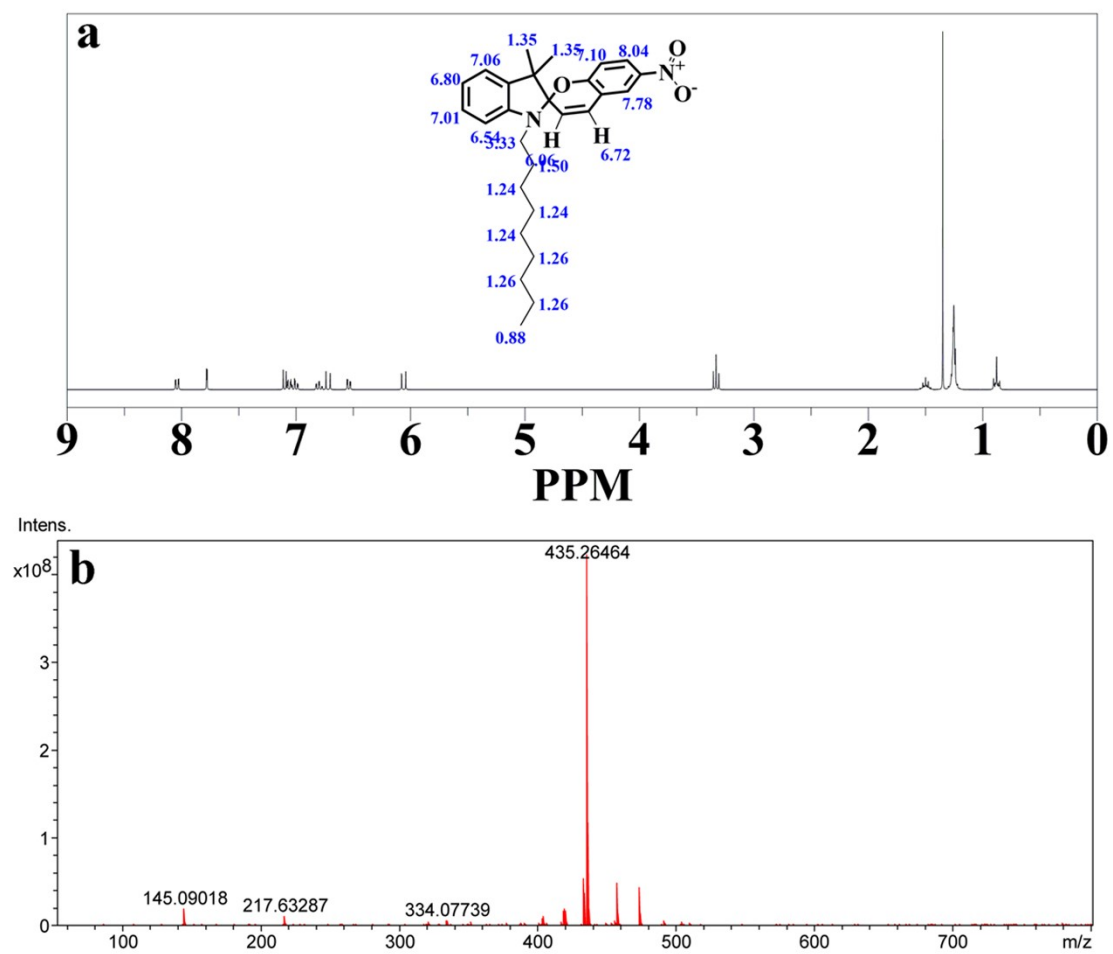

**Figure S5.** (a)  $^1\text{H}$  NMR spectrum and estimation (inset) of SP-C9, and (b) high mass spectrum of SP-C9.

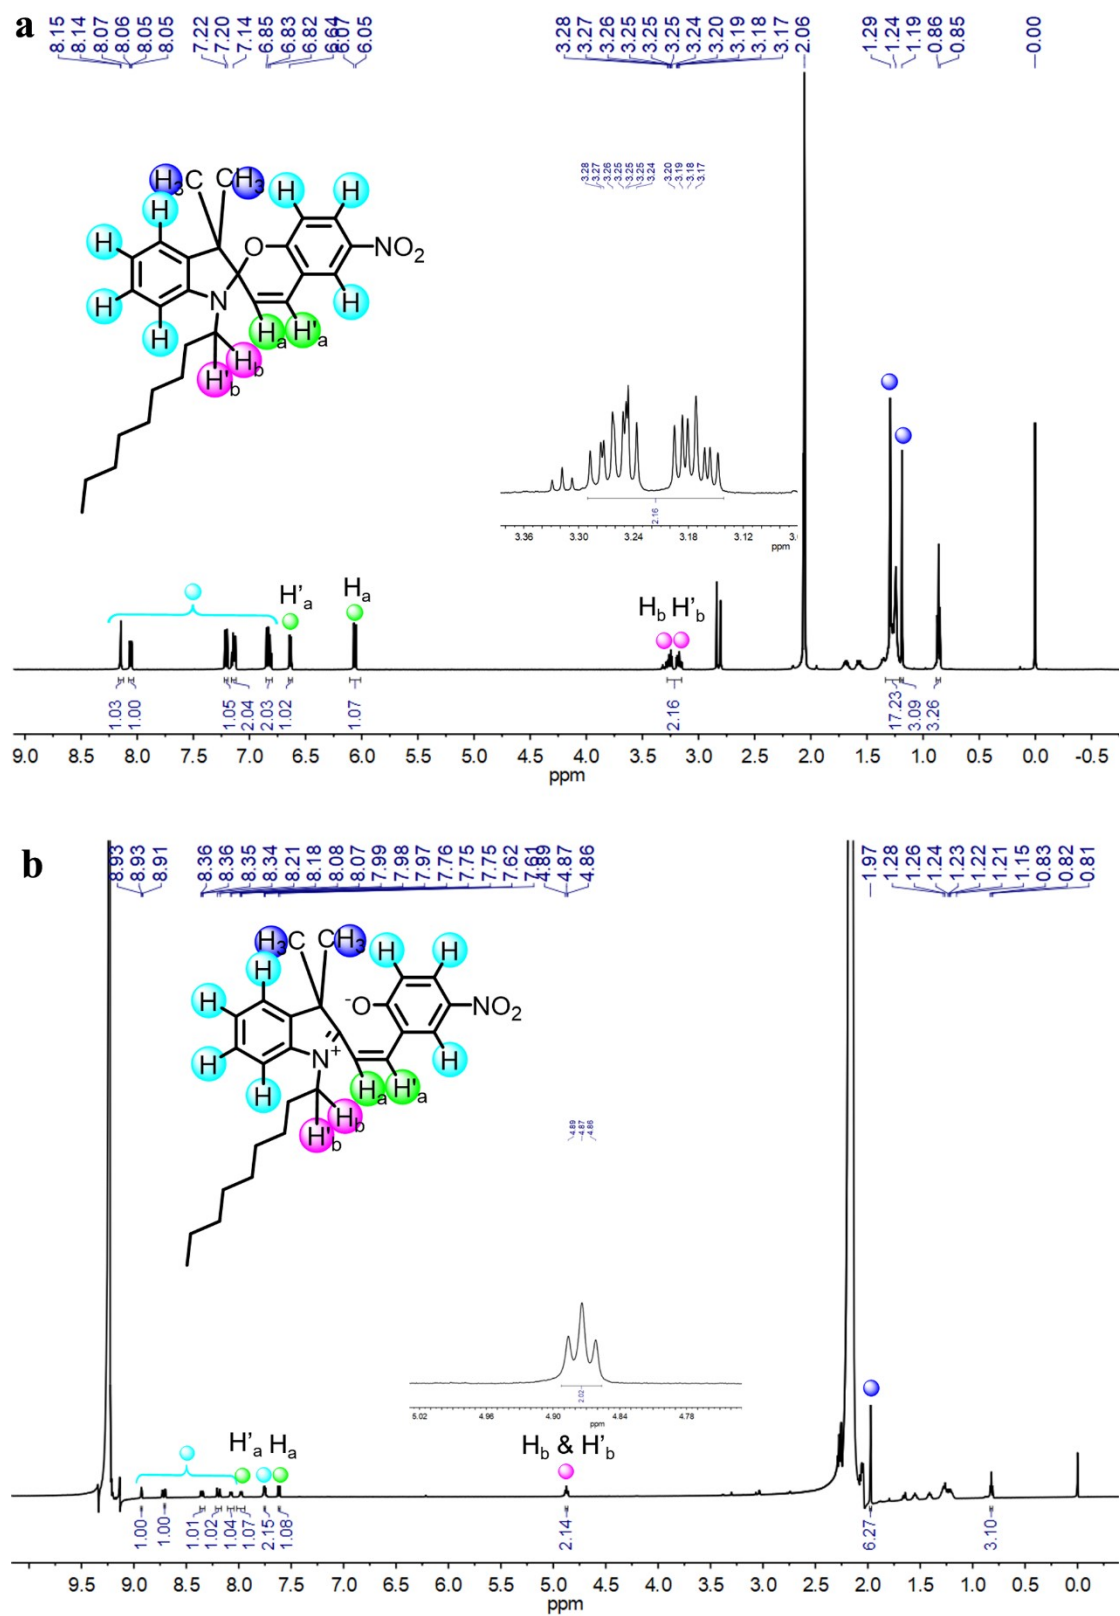

**Figure S6.**  $^1\text{H}$  NMR spectrum of SP-C9 in acetone- $d_6$  with neutral (a) and acidic pH (b).
